# Supplementary material
Source: PubMed Central journal article supplement (PMC9931765)
Supplement: 41541_2023_620_MOESM1_ESM.pdf [file 41541_2023_620_MOESM1_ESM.pdf]

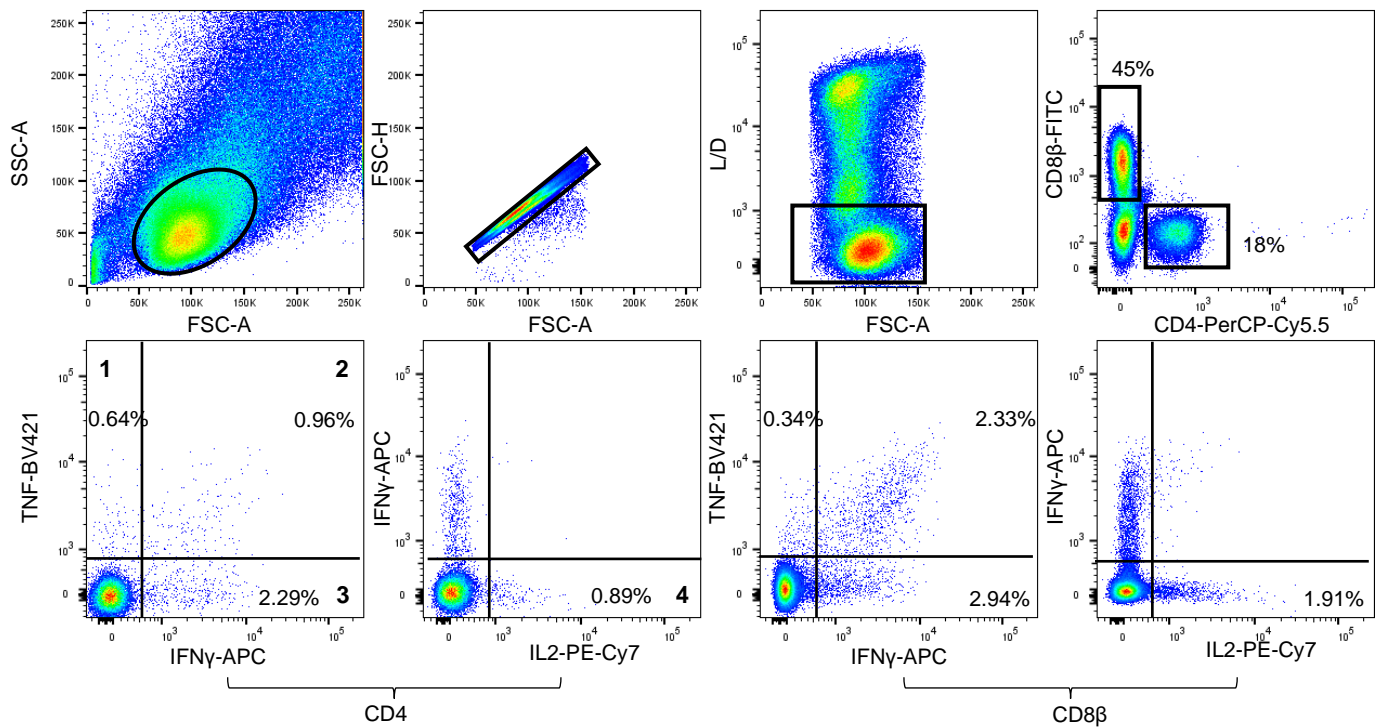

**Suppl. Figure 1. Gating strategy followed for analysis of cytokine production by porcine CD4 and CD8 T cells.** Cells were stimulated overnight with pH1N1 or H3N2 or for 5 hours with NP2 or M1, followed by intracellular cytokine staining. Lymphocytes were gated by light scatter properties and were further sub-gated for exclusion of doublets and dead cells. Live cells were gated for CD4 and CD8β cells and production of TNF (1), IFNγ (3), TNF/IFNγ (2) and IL-2 (4) was determined with the indicated gates. The gates shown are from BAL tissue stimulated with pH1N1.

**a**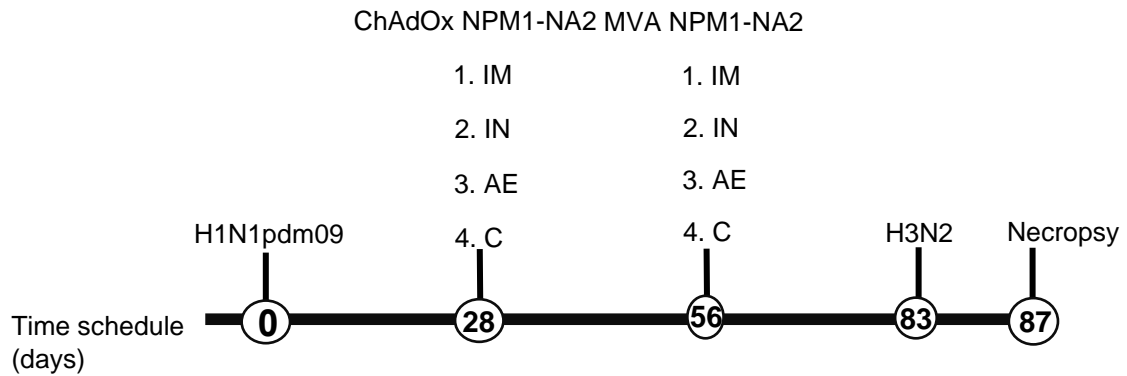**b**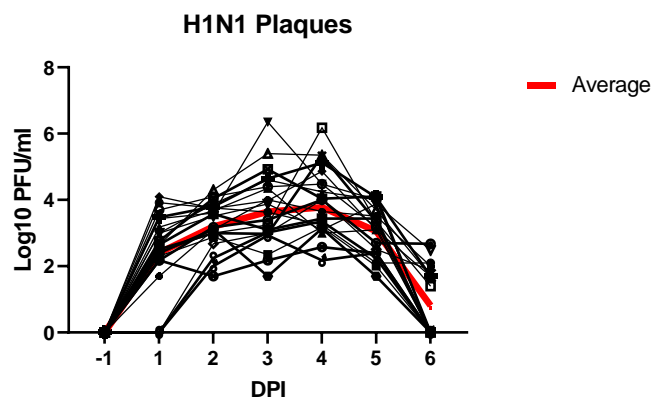

**Suppl. Figure 2. Experimental design and pH1N1 viral load for the efficacy study.** Twenty-four pigs were infected with pH1N1 Influenza A virus, four weeks later immunized with ChAdOx-NPM1-NA2 intramuscularly (IM), intranasally (IN) or by aerosol (AE) and four weeks later boosted with MVA-NPM1-NA2. After four weeks all pigs were challenged with H3N2 and four days later culled. Control (C) animals were infected but not immunized. Weekly blood samples were collected **(a)**. pH1N1 virus load was determined by plaque assay of daily nasal swabs at the indicated days post infection (DPI) following pH1N1 inoculation on D0 **(b)**.

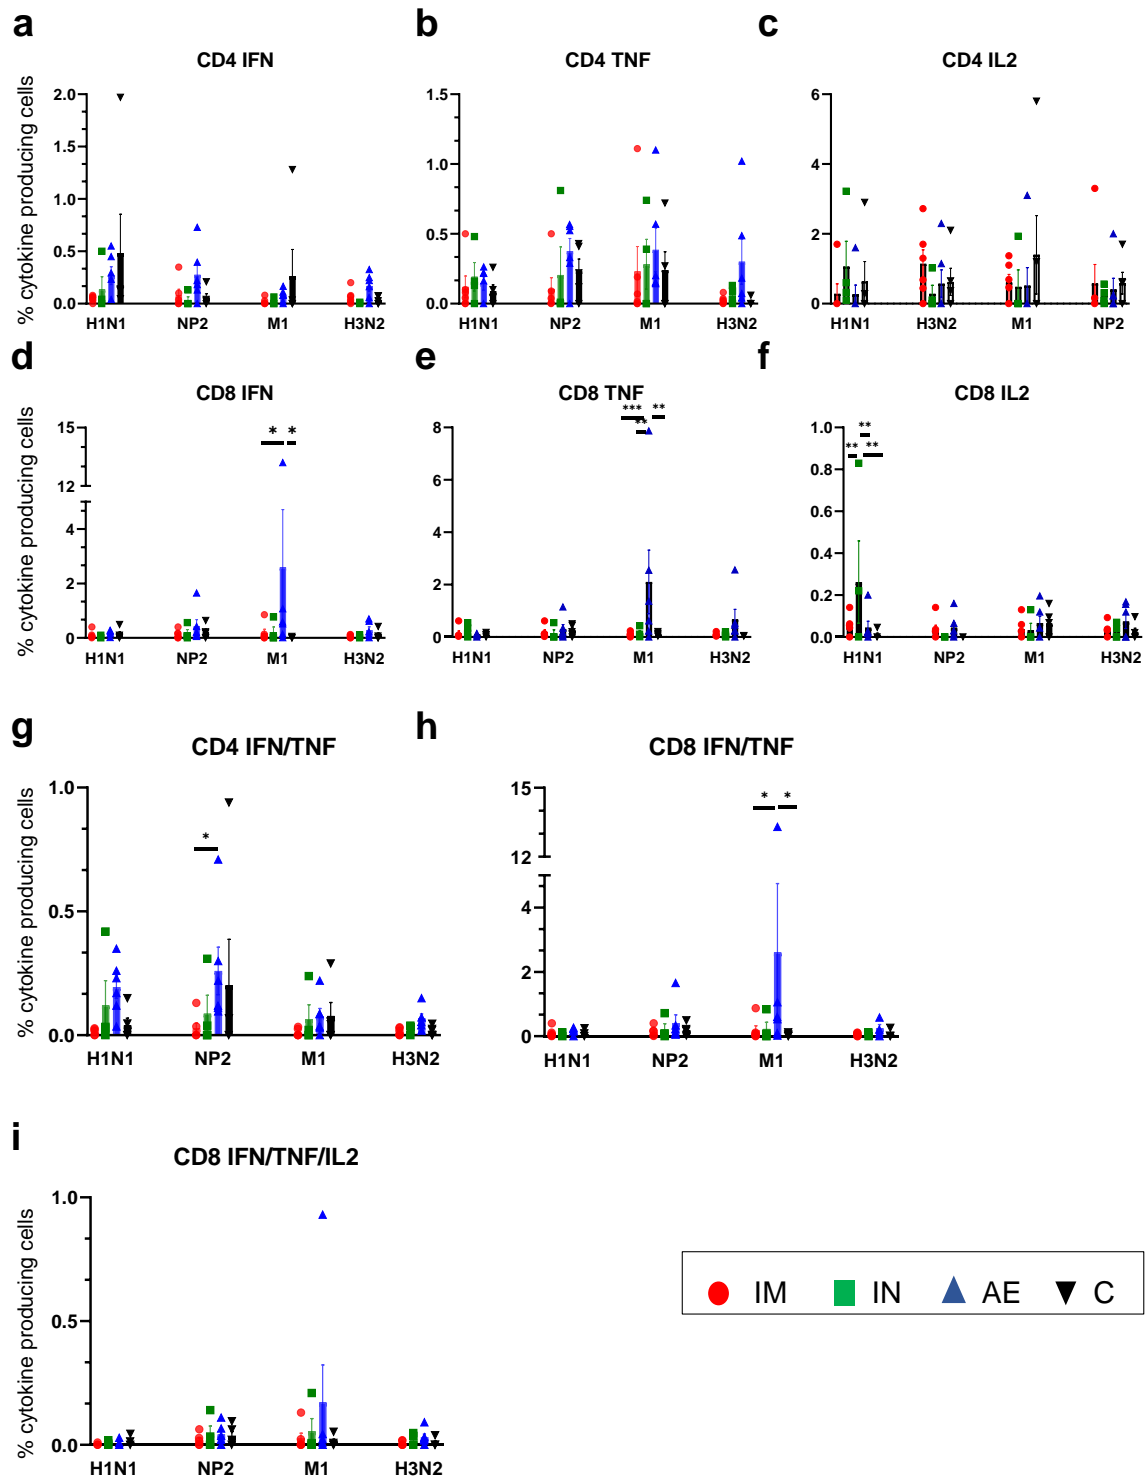

**Suppl. Figure 3. T cell cytokine responses in BAL.** BAL was collected four days after the H3N2 challenge. Cryopreserved cells from D87 were thawed, stimulated with pH1N1, NP2, M1 or H3N2 and IFN $\gamma$ , IL-2, TNF, IFN $\gamma$ /TNF and IFN $\gamma$ /TNF/IL-2 cytokine secretion was measured in CD4 (**a-c, g**) and CD8 (**d-f, h, i**). T cells by intracellular cytokine staining. Each symbol represents an individual animal, the top of the bar the mean and the line the standard error (SEM). Two-way ANOVA and Bonferroni's multiple comparisons test were used to compare responses between groups and asterisks indicate significant differences (\* $p < 0.05$ , \*\* $p < 0.01$ , \*\*\* $p < 0.001$ ).
